# Supplementary material for: Drivers of routine immunization coverage improvement in Africa: findings from district-level case studies
Source: PubMed Central journal article supplement — Health Policy Plan. 2014 Mar 10;30(3):298–308. doi: 10.1093/heapol/czu011 (PMC4353894; doi:10.1093/heapol/czu011), 2014-03-10
Supplement: supp_czu011_czu011_Chinese.pdf [file supp_czu011_czu011_Chinese.pdf]

## 非洲常规免疫项目覆盖率提高的动因：地区级别个案研究的发现

对于为什么在非洲免疫项目在一些地区的覆盖率提高而另一些地区的覆盖率没有提高的研究非常有限。通过使用以事实为依据的理论方法，我们开展了一项深度的个案研究来分析三个国家中 12 个地区（埃塞尔比亚、喀麦隆、加纳）免疫项目覆盖率提高的途径。我们使用正向偏差和资本模型的方法来对比破伤风三合一疫苗（DTP3）或五价疫苗（Penta3）覆盖率提高地区和同一时期这两种疫苗覆盖率保持原有水平的地区的经验，主要关注提供免疫注射的基本准备和覆盖率提高的动因。研究结果展现出一个免疫项目覆盖率提高的模型，该模型主要强调地区级别免疫系统的动力。不论提高或保持稳定，我们发现所有地区从 2006 年到 2010 年都布置了一组基本的常规免疫系统资源并且在基础设施上并没有重大区别。原因并不在于基础常规免疫系统的能力或对提供服务的准备。我们发现影响常规免疫覆盖率表现有 6 个共有动因——4 种直接动因和 2 种驱动因素——体现在表现好地区以及表现较弱的甚至缺乏覆盖率的地区，并勘察了从供给提高的动因、需求和覆盖率的途径。研究结果强调了对策略进行实施这一关键性角色，和对能够根据本地环境对策略因地制宜的本地熟练管理人员的需求。案例研究对于研究正向动因和发现覆盖率提高的途径很有帮助，在未来对地区级别免疫系统表现进行研究和常规评估时应该继续使用。
