# Supplementary material for: Drivers of routine immunization coverage improvement in Africa: findings from district-level case studies
Source: PubMed Central journal article supplement — Health Policy Plan. 2014 Mar 10;30(3):298–308. doi: 10.1093/heapol/czu011 (PMC4353894; doi:10.1093/heapol/czu011), 2014-03-10
Supplement: supp_czu011_czu011_French.pdf [file supp_czu011_czu011_French.pdf]

# Facteurs qui permettent d'améliorer la couverture vaccinale en Afrique : résultats d'études de cas au niveau des districts

Accepté le 28 janvier 2014

Notre compréhension est limitée lorsqu'il s'agit de savoir pourquoi la couverture de la vaccination systématique (VS) s'améliore dans certaines régions d'Afrique et non dans d'autres. A partir d'une approche dite de théorie ancrée, nous avons mené des études de cas approfondies afin de comprendre les étapes qui permettent d'améliorer le processus de vaccination en comparant les programmes de vaccination de douze districts dans trois pays (Ethiopie, Cameroun et Ghana). En s'appuyant sur la déviance positive ou sur un modèle d'actifs techniques, nous avons comparé, sur la même période, les districts où la couverture de la diphtérie-tétanos-coqueluche (DTP3)/pentavalent3 (penta3) s'est améliorée par rapport à ceux où la couverture du DTP3/Penta3 reste inchangée (ou constante) en se concentrant sur la préparation élémentaire pour fournir des services de vaccination et en se concentrant aussi sur les facteurs permettant d'améliorer la couverture. Les résultats ont servi pour développer un modèle de couverture vaccinale en mettant l'accent sur la dynamique du système de vaccination au niveau d'un district. Dans tous les districts, qu'ils se soient améliorés ou qu'ils n'aient pas changé, nous avons constaté que des ressources avaient été rassemblées, entre 2006 et 2010, pour la mise en place d'un système de VS simple et n'avait eu aucun impact majeur sur les infrastructures. Nous avons aussi observé que les différences au niveau de la couverture dépendaient de facteurs autres qu'un système de VS simple ou qu'un niveau de préparation adéquate des différents services. Nous avons pu identifier six facteurs communs permettant d'améliorer l'efficacité de la couverture de la VS, quatre facteurs directs et deux facteurs habilitants, que l'on retrouve dans les districts performants et qui sont inexistantes ou presque dans les districts ayant une couverture inchangée. A partir de ces facteurs, nous avons pu cartographier le processus qui permet d'améliorer la livraison, la demande et la couverture. Ce constat renforce le rôle critique de la mise en place de telles stratégies et la nécessité, au niveau local, d'avoir des managers performants capables de mettre en place des stratégies taillées sur mesure par rapport aux spécificités locales et aux besoins de la communauté. Les études de cas qui se concentrent sur les facteurs positifs de changement et sur l'identification des meilleurs moyens pour améliorer la couverture sont rares, cette approche devrait être prise en compte pour les futures études ainsi que pour l'évaluation de la performance du système de vaccination au niveau d'un district.

Mots clés : vaccination, couverture vaccinale, DTP3, Penta3, amélioration de la performance, Afrique, système de vaccination, système de santé, étude de cas, méthode mixte, déviance positive, Cameroun, Ethiopie, Ghana, EPI
