# Supplementary material for: Drivers of routine immunization coverage improvement in Africa: findings from district-level case studies
Source: PubMed Central journal article supplement — Health Policy Plan. 2014 Mar 10;30(3):298–308. doi: 10.1093/heapol/czu011 (PMC4353894; doi:10.1093/heapol/czu011), 2014-03-10
Supplement: supp_czu011_czu011_Spanish.pdf [file supp_czu011_czu011_Spanish.pdf]

## **Impulsores de progreso el cubrimiento de la inmunización rutinaria en África: hallazgos de estudios de caso a nivel de distrito**

**Anne LaFond, Natasha Kanagat, Robert Steinglass, Rebecca Fields, Jenny Sequeira y Sangeeta Mookherji**

**Aceptado 28 de enero de 2014**

Hay una comprensión limitada de por qué la cobertura de inmunización rutinaria (IR) mejora en algunos lugares de África y no en otros. Utilizando un enfoque teórico fundamentado, llevamos a cabo estudios de caso a profundidad a fin de entender las vías para mejorar la cobertura comparando las experiencias de los programas de vacunación en 12 distritos en tres países (Etiopía, Camerún y Ghana). Sobre la base de las técnicas de modelos de desviaciones positivas o de activos se comparó la experiencia de los distritos donde la cobertura de difteria-tétano-tosferina (DTP3)/pentavalente3 (Penta3) mejoró con los distritos donde la cobertura DTP3/Penta3 permaneció sin cambios (o constante) durante el mismo período, enfocándose en la preparación básica para prestar servicios de inmunización y los impulsores de mejora en la cobertura. Los resultados mostraron un modelo para mejorar la cobertura de la inmunización que hace hincapié en la dinámica de los sistemas de inmunización a nivel distrital. En todos los distritos, bien fuera en mejora o sin mostrar cambio, se encontró que un conjunto de recursos básicos del sistema de IR estaban vigentes desde 2006 hasta 2010 y no se observaron mayores diferencias en la infraestructura. Encontramos que las diferencias en las tendencias de cobertura se debían a factores que no tenían que ver con la capacidad básica del sistema de IR o la preparación para el servicio. Se identificaron seis factores comunes de mejora en el rendimiento de la cobertura – cuatro impulsores directos y dos impulsores habilitadores – que estaban presentes en los distritos de buen rendimiento y más débiles o ausentes en los distritos de cobertura constante, y trazamos las rutas desde el impulsor hasta la mejora en el suministro, la demanda y la cobertura. Los resultados destacan el papel fundamental de las estrategias de implementación y la necesidad de que existan administradores localmente calificados que sean capaces de adaptar las estrategias a ámbitos específicos y las necesidades de la comunidad. Los estudios de caso son

únicos en su enfoque en los impulsores positivos de cambio y la identificación de las vías para mejorar la cobertura, un enfoque que debe ser considerado en futuros estudios y evaluaciones de rutina de los sistemas de inmunización a nivel distrital.

### **Palabras Claves**

Inmunización, vacunación, DTP3, Penta3, mejora del rendimiento, África, sistema de inmunización, sistema de salud, estudio de caso, método mixto, desviación positiva, Camerún, Etiopía, Ghana, PAI

### **MENSAJES CLAVES**

- La capacidad de comprender a fondo las necesidades y deseos de la comunidad, y ajustar las estrategias de implementación a la medida de las necesidades específicas parece fundamental para mejoría de la cobertura de las inmunizaciones rutinarias (IR) a nivel a nivel distrital. Es necesario un equilibrio entre la inversión en los componentes esenciales de un sistema de inmunización (recursos que permiten la preparación de los programas) y la capacidad de la fuerza de trabajo para diseñar y ejecutar estrategias de implementación.
- Redes y alianzas que generen confianza a través de la colaboración entre los equipos de salud distritales y los actores locales a ofrecer aportan una base esencial para el compromiso compartido para mejorar el desempeño de los programas de inmunización.
- Las estrategias de evaluación basadas en activos que se centran en definir y aplicar las estrategias de implementación eficaces son herramientas importantes para comprender las vías dinámicas de mejora de la cobertura y permitir el aprendizaje en diferentes ámbitos.
- Hay una comprensión limitada de por qué la cobertura de IR mejora en algunos lugares y en otros no. Se necesitan estudios que utilicen un lente basado en activos para explorar la dinámica de la mejora de la cobertura para complementar las evaluaciones típicas que analizan por qué las estrategias de mejora de la cobertura fallan.
- Muchos de los impulsores que influyen directamente en la mejora de la cobertura de la inmunización son estrategias que son igualmente relevantes para el fortalecimiento del sistema de salud.
